# Supplementary material
Source: PubMed Central journal article supplement (PMC8922452)
Supplement: NIHMS1778766-supplement-Supporting_Information.pdf [file NIHMS1778766-supplement-Supporting_Information.pdf]

## Supporting Information for

### Key Factors Governing Initial Stages of Lipid Droplet Formation

Siyoung Kim,<sup>1</sup> Chenghan Li,<sup>2</sup> Robert V. Farese, Jr.,<sup>3,4,5</sup> Tobias C. Walther,<sup>3,4,5,6</sup> and Gregory A. Voth<sup>2\*</sup>

<sup>1</sup>Pritzker School of Molecular Engineering, The University of Chicago, Chicago, IL, 60637 USA

<sup>2</sup>Department of Chemistry, Chicago Center for Theoretical Chemistry, James Franck Institute, and Institute for Biophysical Dynamics, The University of Chicago, Chicago, IL, 60637 USA

<sup>3</sup>Department of Molecular Metabolism, Harvard T.H. Chan School of Public Health, Boston, MA 02115, USA

<sup>4</sup>Department of Cell Biology, Harvard Medical School, Boston, MA 02115, USA

<sup>5</sup>Broad Institute of Harvard and MIT, Cambridge, MA 02142, USA

<sup>6</sup>Howard Hughes Medical Institute, Boston, MA 02115, USA

\*Corresponding Author: [gavoth@uchicago.edu](mailto:gavoth@uchicago.edu)

#### Coarse-grained model attraction parameters ( $B$ in eq. 1 of the main text)

| $k_B T / \text{\AA}$ | H   | PGL | TGL | T   |
|----------------------|-----|-----|-----|-----|
| H                    | 0.0 | 0.0 | 0.0 | 0.0 |
| PGL                  | 0.0 | 1.0 | 0.0 | 0.0 |
| TGL                  | 0.0 | 0.0 | 1.1 | 1.0 |
| T                    | 0.0 | 0.0 | 1.0 | 1.0 |

## PLUMED script for biasing simulations

```
MOLINFO STRUCTURE=molinfo.pdb
```

```
lq:      COORDINATIONNUMBER  SPECIES={@mda:{name TGI}}  SWITCH={CUBIC D_0=1.95 D_MAX=2.0}  LOWMEM
cm:      CONTACT_MATRIX      ATOMS=lq                        SWITCH={CUBIC D_0=1.95 D_MAX=2.0}
dfs:     DFSCUSTERING        MATRIX=cm                          LOWMEM
clust1:  CLUSTER_PROPERTIES  CLUSTERS=dfs    CLUSTER=1    SUM
```

```
METAD ...
label=m
ARG=clust1.sum
HEIGHT=2.0
SIGMA=10
PACE=500
GRID_MIN=0
GRID_MAX=3000
GRID_WSTRIDE=500000
GRID_WFILE=grid.dat
TEMP=310
BIASFACTOR=50
CALC_RCT
... METAD
```

```
ss: CLUSTER_NATOMS CLUSTERS=dfs CLUSTER=1
PRINT ARG=clust1.sum,ss,m.bias,m.rbias STRIDE=500 FILE=colvar
```
